# Supplementary material
Source: Springer Nature journal article supplement (https://www.springermedizin.de/resource/supplementary/12984_2011_397_MOESM8_ESM.pdf/9605856)

P01

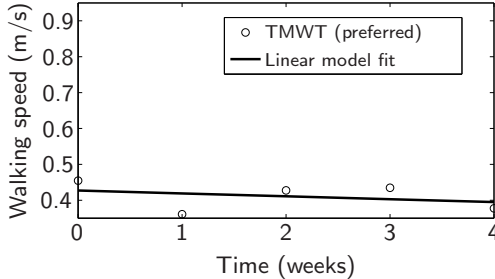

(a) P01 SSV

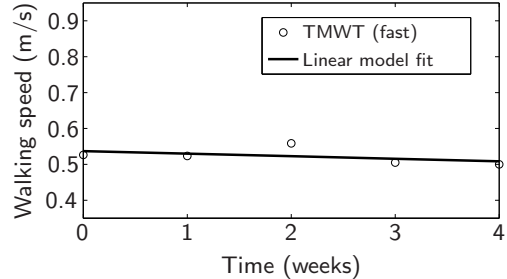

(b) P01 FV

P03

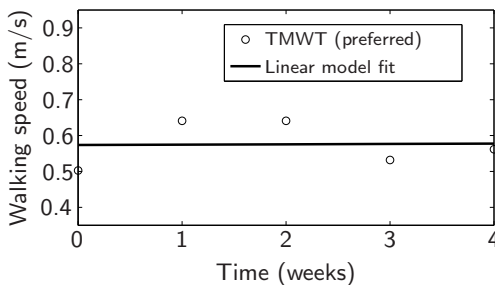

(c) P03 SSV

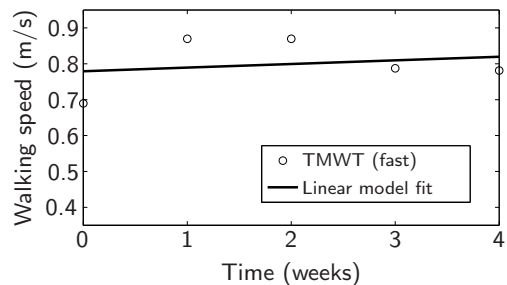

(d) P03 FV

P04

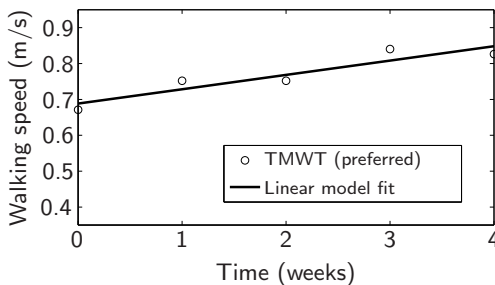

(e) P04 SSV

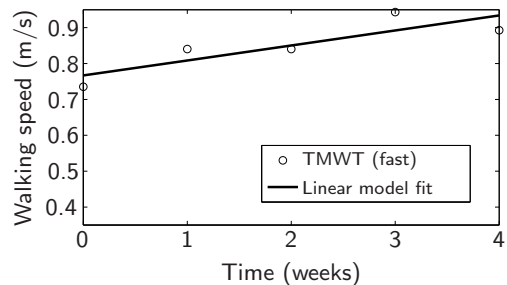

(f) P04 FV

P06

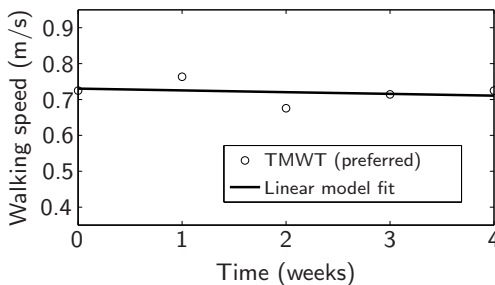

(g) P06 SSV

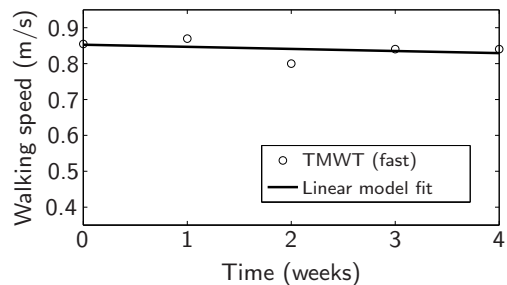

(h) P06 FV

Supplement: MOESM8 [file 9605856]
